# Supplementary material
Source: HighWire-hosted journal article supplement (https://www.jrheum.org/highwire/filestream/29763/field_highwire_adjunct_files/0/150184DataSuppl.pdf)
Supplement: 150184DataSuppl.pdf [file 150184DataSuppl.pdf]

## ONLINE SUPPLEMENTARY DATA

*Supplementary Table 1.* Association of LTL with incident RA risk by seropositivity status in the Nurses' Health Studies and the Women's Health Study combined<sup>a</sup>

|                                     | Controls | Seronegative |                   |             | Seropositive |      |             | p-het |
|-------------------------------------|----------|--------------|-------------------|-------------|--------------|------|-------------|-------|
|                                     |          | Cases        | OR                | 95% CI      | Cases        | OR   | 95% CI      |       |
| Shortest tertile                    | 271      | 33           | 1.00              |             | 43           | 1.00 |             |       |
| Intermediate                        | 275      | 47           | 1.10 <sup>d</sup> | 0.29 – 4.12 | 55           | 1.10 | 0.47 – 2.58 |       |
| Longest tertile                     | 281      | 43           | 1.15              | 0.48 – 2.76 | 75           | 1.74 | 1.15 – 2.64 |       |
| Per standard deviation <sup>b</sup> |          |              | 1.05              | 0.75 – 1.48 |              | 1.24 | 1.04 – 1.47 |       |
| P-trend <sup>c</sup>                |          |              | 0.76              |             |              | 0.01 |             | 0.37  |

Ca=cases; Co=controls; OR=odds ratio; CI=confidence interval; BMI=body mass index

<sup>a</sup>Meta-analysis used to combine estimates from polytomous logistic regression analyses adjusted for the same covariates listed in Table 2.

<sup>b</sup>Nurses' Health Study LTL standard deviation = 0.26; Women's Health Study LTL standard deviation = 0.71

<sup>c</sup>Based on per standard deviation analysis

<sup>d</sup>Significant heterogeneity between studies (p=0.02)

*Supplementary Table 2.* Association of LTL with incident RA risk by HLA-DRB1 status in the Nurses' Health Studies<sup>a</sup>

|                                     | HLA_SE non-carrier |      |             | HLA_SE carrier |      |             | P-het |
|-------------------------------------|--------------------|------|-------------|----------------|------|-------------|-------|
|                                     | Ca/Co              | OR   | 95% CI      | Ca/Co          | OR   | 95% CI      |       |
| Shortest tertile                    | 35/113             | 1.00 |             | 51/85          | 1.00 |             |       |
| Intermediate                        | 46/111             | 2.56 | 1.42 – 4.63 | 40/80          | 1.22 | 0.68 – 2.18 |       |
| Longest tertile                     | 20/120             | 1.88 | 1.02 – 3.47 | 31/75          | 1.56 | 0.88 – 2.78 |       |
| Per standard deviation <sup>b</sup> |                    | 1.25 | 0.99 – 1.58 |                | 1.14 | 0.91 – 1.42 |       |
| P-trend <sup>c</sup>                |                    | 0.06 |             |                | 0.26 |             | 0.45  |

Ca=cases; Co=controls; OR=odds ratio; CI=confidence interval

<sup>a</sup>Unconditional logistic regression analyses adjusted for the same covariates listed in Table 2

<sup>b</sup>Nurses' Health Study LTL standard deviation = 0.26

<sup>c</sup>Based on per standard deviation analysis

| <i>Supplementary Table 3. Past Studies of Leukocyte Telomere Length (LTL) in Rheumatoid Arthritis</i> |                                                                 |                    |                                    |                                            |                                                                                                                          |                                                                                                                    |      |
|-------------------------------------------------------------------------------------------------------|-----------------------------------------------------------------|--------------------|------------------------------------|--------------------------------------------|--------------------------------------------------------------------------------------------------------------------------|--------------------------------------------------------------------------------------------------------------------|------|
| First Author, year                                                                                    | Study Design                                                    | Number of RA cases | Number of Controls                 | Cell type                                  | Telomere Assay used                                                                                                      | Findings                                                                                                           | Ref. |
| Koetz, 2000                                                                                           | Cross-sectional, case-control matched on age                    | 51                 | 42                                 | CD4+ T cells                               | Southern blotting, hybridization with a telomere repeat-specific <sup>32</sup> P-end-labeled (CCCTAA) <sub>3</sub> probe | In RA patients, LTL did not correlate with age. LTL appeared shorter in RA patients vs. controls <40 years of age. | 9    |
| Schonland, 2003                                                                                       | Cross-sectional, case-control, unadjusted                       | unspecified        | 37 HLA-DR4+; 37 HLA-DR4 - controls | CD4 + T cells and granulocytes             | As above                                                                                                                 | HLA-DR4+ individuals and RA patients 20-40 years of age had shorter LTL vs. HLA-DR4 -                              | 13   |
| Steer, 2007                                                                                           | Cross-sectional, case-control, adjusted for age and sex         | 176                | 1151                               | WBC                                        | Southern blotting, hybridization with a telomere repeat-specific digoxigenin 3'-end labeled (CCCTAA) <sub>3</sub> probe  | LTL shorter in RA than controls, but not related to RA duration or activity                                        | 34   |
| Colmegna, 2008                                                                                        | Cross-sectional case-control, matched on age, sex and ethnicity | 63                 | 48                                 | CD34+ hematopoietic precursor cells (HPCs) | Quantitative PCR                                                                                                         | LTL shorter in RA patients vs. controls<br>LTL in RA did not correlate with RA duration or treatment               | 14   |

|               |                                                                                                                                      |              |     |     |                  |                                                                                                                                                                            |  |
|---------------|--------------------------------------------------------------------------------------------------------------------------------------|--------------|-----|-----|------------------|----------------------------------------------------------------------------------------------------------------------------------------------------------------------------|--|
| Current study | Prospective, nested case control, matched on age, cohort, menopause and hormone use status, fasting, time of day of blood collection | 296 (Pre-RA) | 827 | WBC | Quantitative PCR | LTL longer in pre-RA patients vs. controls; no heterogeneity by menopausal status, cytokine levels, age, BMI, seropositivity, HLA-DRB1 status, time since blood collection |  |
|---------------|--------------------------------------------------------------------------------------------------------------------------------------|--------------|-----|-----|------------------|----------------------------------------------------------------------------------------------------------------------------------------------------------------------------|--|

## REFERENCES

1. Koetz K, Bryl E, Spickschen K, O'Fallon WM, Goronzy JJ, Weyand CM. T cell homeostasis in patients with rheumatoid arthritis. Proc Natl Acad Sci U S A 2000;97:9203-8.
2. Schonland SO, Lopez C, Widmann T, Zimmer J, Bryl E, Goronzy JJ, et al. Premature telomeric loss in rheumatoid arthritis is genetically determined and involves both myeloid and lymphoid cell lineages. Proc Natl Acad Sci U S A 2003;100:13471-6.
3. Steer SE, Williams FM, Kato B, Gardner JP, Norman PJ, Hall MA, et al. Reduced telomere length in rheumatoid arthritis is independent of disease activity and duration. Ann Rheum Dis 2007;66:476-80.
4. Colmegna I, Diaz-Borjon A, Fujii H, Schaefer L, Goronzy JJ, Weyand CM. Defective proliferative capacity and accelerated telomeric loss of hematopoietic progenitor cells in rheumatoid arthritis. Arthritis Rheum 2008;58:990-1000.
